# Supplementary material
Source: publisher figshare collection journal article supplement (https://sage.figshare.com/ndownloader/files/21748323)
Supplement: Supplementary file 1 [file 21748323]

# Online Appendix for “Preferences for the Scope of Protests”<sup>\*</sup>

Miquel Pellicer<sup>1</sup>, Eva Wegner<sup>2</sup>, and Alexander De Juan<sup>3</sup>

<sup>1</sup>Maynooth University & University of Duisburg-Essen

<sup>2</sup>University College Dublin

<sup>3</sup>University of Osnabrück

---

<sup>\*</sup>This document contains all appendix material that is referred to in the main document.

## A Appendix Tables and Figures

Table A.1: Comparison of Survey and 2011 Census Demographics

|                               | Gugulethu |        | Mitchells Plain |        |
|-------------------------------|-----------|--------|-----------------|--------|
|                               | census    | survey | census          | survey |
| secondary schooling completed | 37.5      | 36.8   | 32.9            | 31.6   |
| employed                      | 39.1      | 32.2   | 38.2            | 29.5   |
| female                        | 51.0      | 60.1   | 51.4            | 60.6   |

Table A.2: Summary Statistics: Full Sample

|                                       | count | mean  | sd   | min | max |
|---------------------------------------|-------|-------|------|-----|-----|
| <i>Grievances:</i>                    |       |       |      |     |     |
| – grievance level                     | 1482  | 3.24  | 0.55 | 0   | 4   |
| <i>Protest Efficacy:</i>              |       |       |      |     |     |
| – protests make politicians listen    | 1482  | 2.42  | 1.23 | 0   | 4   |
| – protests waste of time              | 1482  | 1.75  | 1.26 | 0   | 4   |
| – protests make politicians respond   | 1482  | 2.38  | 1.18 | 0   | 4   |
| – protest efficacy index              | 1482  | -0.00 | 1.00 | -2  | 2   |
| <i>Political Efficacy:</i>            |       |       |      |     |     |
| – can punish politicians              | 1482  | 2.45  | 1.30 | 0   | 4   |
| – dishonest politicians can be shamed | 1482  | 2.88  | 1.07 | 0   | 4   |
| – community can pressure politicians  | 1482  | 2.97  | 1.04 | 0   | 4   |
| – political efficacy index            | 1482  | -0.00 | 1.00 | -3  | 1   |
| <i>Social Efficacy:</i>               |       |       |      |     |     |
| – fair society achievable             | 1482  | 4.20  | 0.87 | 1   | 5   |
| – community stands up f. fair society | 1481  | 0.61  | 0.49 | 0   | 1   |
| – inequality inevitable               | 1444  | 0.38  | 0.49 | 0   | 1   |
| – social efficacy index               | 1443  | 0.00  | 1.00 | -3  | 2   |
| <i>Other Efficacy Variables:</i>      |       |       |      |     |     |
| – protest type effective.             | 1466  | 0.55  | 0.50 | 0   | 1   |
| – combined efficacy index             | 1482  | 0.00  | 1.00 | -4  | 2   |
| <i>Personal Power:</i>                |       |       |      |     |     |
| – people listen to me                 | 1482  | 3.14  | 0.84 | 0   | 4   |
| – my opinions are ignored             | 1482  | 1.48  | 1.10 | 0   | 4   |
| – my wishes not valued                | 1482  | 1.57  | 1.10 | 0   | 4   |
| – power index                         | 1482  | 0.00  | 1.00 | -3  | 2   |
| <i>Crime Blame:</i>                   |       |       |      |     |     |

---

|                                    |      |       |       |    |    |
|------------------------------------|------|-------|-------|----|----|
| – blame people                     | 1463 | 0.19  | 0.39  | 0  | 1  |
| – blame police                     | 1463 | 0.14  | 0.34  | 0  | 1  |
| – blame government                 | 1463 | 0.33  | 0.47  | 0  | 1  |
| – blame poverty/inequ              | 1463 | 0.34  | 0.48  | 0  | 1  |
| <i>Service Blame:</i>              |      |       |       |    |    |
| – blame people                     | 1482 | 0.25  | 0.43  | 0  | 1  |
| – blame agency                     | 1482 | 0.11  | 0.31  | 0  | 1  |
| – blame government                 | 1482 | 0.32  | 0.47  | 0  | 1  |
| – blame poverty/inequ              | 1482 | 0.33  | 0.47  | 0  | 1  |
| – broad blame attrib.              | 1463 | 5.56  | 1.71  | 2  | 8  |
| <i>Protest Scope:</i>              |      |       |       |    |    |
| – choice docs & nurses march       | 1469 | 0.44  | 0.50  | 0  | 1  |
| – choice corruption march          | 1469 | 0.31  | 0.46  | 0  | 1  |
| – choice redistribution march      | 1469 | 0.25  | 0.43  | 0  | 1  |
| – net support redistribution march | 1482 | -0.43 | 1.19  | -3 | 3  |
| – net support corruption march     | 1482 | -0.29 | 1.05  | -3 | 3  |
| <i>Petition:</i>                   |      |       |       |    |    |
| – petition personnell              | 1362 | 0.42  | 0.49  | 0  | 1  |
| – petition corruption              | 1362 | 0.33  | 0.47  | 0  | 1  |
| – petition redistribution          | 1362 | 0.25  | 0.43  | 0  | 1  |
| <i>Demographics:</i>               |      |       |       |    |    |
| – female                           | 1482 | 0.60  | 0.49  | 0  | 1  |
| – age                              | 1478 | 43.37 | 16.33 | 18 | 96 |
| – secondary school degree          | 1482 | 0.34  | 0.47  | 0  | 1  |

---

Table A.3: Summary Statistics: Control Group

|                                       | count | mean  | sd   | min | max |
|---------------------------------------|-------|-------|------|-----|-----|
| <i>Grievances:</i>                    |       |       |      |     |     |
| – grievance level                     | 703   | 3.23  | 0.55 | 0   | 4   |
| <i>Protest Efficacy:</i>              |       |       |      |     |     |
| – protests make politicians listen    | 703   | 2.34  | 1.25 | 0   | 4   |
| – protests waste of time              | 703   | 1.81  | 1.29 | 0   | 4   |
| – protests make politicians respond   | 703   | 2.34  | 1.16 | 0   | 4   |
| – protest efficacy index              | 703   | -0.06 | 1.01 | -2  | 2   |
| <i>Political Efficacy:</i>            |       |       |      |     |     |
| – can punish politicians              | 703   | 2.40  | 1.29 | 0   | 4   |
| – dishonest politicians can be shamed | 703   | 2.86  | 1.12 | 0   | 4   |
| – community can pressure politicians  | 703   | 2.93  | 1.09 | 0   | 4   |
| – political efficacy index            | 703   | -0.04 | 1.02 | -3  | 1   |
| <i>Social Efficacy:</i>               |       |       |      |     |     |
| – fair society achievable             | 703   | 4.19  | 0.87 | 1   | 5   |
| – community stands up f. fair society | 703   | 0.60  | 0.49 | 0   | 1   |
| – inequality inevitable               | 689   | 0.38  | 0.48 | 0   | 1   |
| – social efficacy index               | 689   | -0.01 | 0.99 | -3  | 2   |
| <i>Other Efficacy Variables:</i>      |       |       |      |     |     |
| – protest type effective.             | 698   | 0.53  | 0.50 | 0   | 1   |
| – combined efficacy index             | 703   | -0.05 | 1.00 | -4  | 2   |
| <i>Personal Power:</i>                |       |       |      |     |     |
| – people listen to me                 | 703   | 3.13  | 0.86 | 0   | 4   |
| – my opinions are ignored             | 703   | 1.50  | 1.09 | 0   | 4   |
| – my wishes not valued                | 703   | 1.66  | 1.11 | 0   | 4   |
| – power index                         | 703   | -0.04 | 1.01 | -3  | 2   |
| <i>Crime Blame:</i>                   |       |       |      |     |     |

---

|                                    |     |       |       |    |    |
|------------------------------------|-----|-------|-------|----|----|
| – blame people                     | 692 | 0.22  | 0.42  | 0  | 1  |
| – blame police                     | 692 | 0.14  | 0.34  | 0  | 1  |
| – blame government                 | 692 | 0.31  | 0.46  | 0  | 1  |
| – blame poverty/inequ              | 692 | 0.33  | 0.47  | 0  | 1  |
| <i>Service Blame:</i>              |     |       |       |    |    |
| – blame people                     | 703 | 0.29  | 0.45  | 0  | 1  |
| – blame agency                     | 703 | 0.11  | 0.31  | 0  | 1  |
| – blame government                 | 703 | 0.30  | 0.46  | 0  | 1  |
| – blame poverty/inequ              | 703 | 0.30  | 0.46  | 0  | 1  |
| – broad blame attrib.              | 692 | 5.36  | 1.74  | 2  | 8  |
| <i>Protest Scope:</i>              |     |       |       |    |    |
| – choice docs & nurses march       | 694 | 0.46  | 0.50  | 0  | 1  |
| – choice corruption march          | 694 | 0.30  | 0.46  | 0  | 1  |
| – choice redistribution march      | 694 | 0.24  | 0.43  | 0  | 1  |
| – net support redistribution march | 703 | -0.48 | 1.25  | -3 | 3  |
| – net support corruption march     | 703 | -0.29 | 1.11  | -3 | 3  |
| <i>Petition:</i>                   |     |       |       |    |    |
| – petition personnell              | 648 | 0.44  | 0.50  | 0  | 1  |
| – petition corruption              | 648 | 0.32  | 0.47  | 0  | 1  |
| – petition redistribution          | 648 | 0.24  | 0.43  | 0  | 1  |
| <i>Demographics:</i>               |     |       |       |    |    |
| – female                           | 703 | 0.61  | 0.49  | 0  | 1  |
| – age                              | 702 | 42.12 | 16.11 | 18 | 96 |
| – secondary school degree          | 703 | 0.34  | 0.47  | 0  | 1  |

---

Table A.4: Summary Statistics: Low Efficacy Treatment Group

|                                       | count | mean  | sd   | min | max |
|---------------------------------------|-------|-------|------|-----|-----|
| <i>Grievances:</i>                    |       |       |      |     |     |
| – grievance level                     | 396   | 3.23  | 0.53 | 1   | 4   |
| <i>Protest Efficacy:</i>              |       |       |      |     |     |
| – protests make politicians listen    | 396   | 2.34  | 1.24 | 0   | 4   |
| – protests waste of time              | 396   | 1.79  | 1.28 | 0   | 4   |
| – protests make politicians respond   | 396   | 2.24  | 1.23 | 0   | 4   |
| – protest efficacy index              | 396   | -0.09 | 1.03 | -2  | 2   |
| <i>Political Efficacy:</i>            |       |       |      |     |     |
| – can punish politicians              | 396   | 2.52  | 1.33 | 0   | 4   |
| – dishonest politicians can be shamed | 396   | 2.82  | 1.11 | 0   | 4   |
| – community can pressure politicians  | 396   | 2.94  | 1.01 | 0   | 4   |
| – political efficacy index            | 396   | -0.02 | 1.03 | -3  | 1   |
| <i>Social Efficacy:</i>               |       |       |      |     |     |
| – fair society achievable             | 396   | 4.16  | 0.87 | 1   | 5   |
| – community stands up f. fair society | 395   | 0.58  | 0.49 | 0   | 1   |
| – inequality inevitable               | 387   | 0.37  | 0.48 | 0   | 1   |
| – social efficacy index               | 386   | -0.06 | 1.02 | -3  | 2   |
| <i>Other Efficacy Variables:</i>      |       |       |      |     |     |
| – protest type effective.             | 389   | 0.56  | 0.50 | 0   | 1   |
| – combined efficacy index             | 396   | -0.09 | 1.02 | -4  | 2   |
| <i>Personal Power:</i>                |       |       |      |     |     |
| – people listen to me                 | 396   | 3.05  | 0.86 | 0   | 4   |
| – my opinions are ignored             | 396   | 1.51  | 1.11 | 0   | 4   |
| – my wishes not valued                | 396   | 1.52  | 1.08 | 0   | 4   |
| – power index                         | 396   | -0.04 | 1.01 | -3  | 2   |
| <i>Crime Blame:</i>                   |       |       |      |     |     |

---

|                                    |     |       |       |    |    |
|------------------------------------|-----|-------|-------|----|----|
| – blame people                     | 394 | 0.19  | 0.40  | 0  | 1  |
| – blame police                     | 394 | 0.16  | 0.37  | 0  | 1  |
| – blame government                 | 394 | 0.32  | 0.47  | 0  | 1  |
| – blame poverty/inequ              | 394 | 0.32  | 0.47  | 0  | 1  |
| <i>Service Blame:</i>              |     |       |       |    |    |
| – blame people                     | 396 | 0.24  | 0.43  | 0  | 1  |
| – blame agency                     | 396 | 0.13  | 0.34  | 0  | 1  |
| – blame government                 | 396 | 0.32  | 0.47  | 0  | 1  |
| – blame poverty/inequ              | 396 | 0.32  | 0.47  | 0  | 1  |
| – broad blame attrib.              | 394 | 5.48  | 1.72  | 2  | 8  |
| <i>Protest Scope:</i>              |     |       |       |    |    |
| – choice docs & nurses march       | 393 | 0.42  | 0.49  | 0  | 1  |
| – choice corruption march          | 393 | 0.37  | 0.48  | 0  | 1  |
| – choice redistribution march      | 393 | 0.21  | 0.41  | 0  | 1  |
| – net support redistribution march | 396 | -0.42 | 1.11  | -3 | 3  |
| – net support corruption march     | 396 | -0.24 | 1.05  | -3 | 3  |
| <i>Petition:</i>                   |     |       |       |    |    |
| – petition personnell              | 366 | 0.40  | 0.49  | 0  | 1  |
| – petition corruption              | 366 | 0.39  | 0.49  | 0  | 1  |
| – petition redistribution          | 366 | 0.21  | 0.41  | 0  | 1  |
| <i>Demographics:</i>               |     |       |       |    |    |
| – female                           | 396 | 0.59  | 0.49  | 0  | 1  |
| – age                              | 393 | 44.36 | 16.47 | 18 | 88 |
| – secondary school degree          | 396 | 0.35  | 0.48  | 0  | 1  |

---



Table A.5: Summary Statistics: High Efficacy Treatment Group

|                                       | count | mean | sd   | min | max |
|---------------------------------------|-------|------|------|-----|-----|
| <i>Grievances:</i>                    |       |      |      |     |     |
| – grievance level                     | 383   | 3.27 | 0.55 | 1   | 4   |
| <i>Protest Efficacy:</i>              |       |      |      |     |     |
| – protests make politicians listen    | 383   | 2.65 | 1.15 | 0   | 4   |
| – protests waste of time              | 383   | 1.58 | 1.17 | 0   | 4   |
| – protests make politicians respond   | 383   | 2.57 | 1.13 | 0   | 4   |
| – protest efficacy index              | 383   | 0.20 | 0.91 | -2  | 2   |
| <i>Political Efficacy:</i>            |       |      |      |     |     |
| – can punish politicians              | 383   | 2.45 | 1.30 | 0   | 4   |
| – dishonest politicians can be shamed | 383   | 2.99 | 0.93 | 0   | 4   |
| – community can pressure politicians  | 383   | 3.07 | 0.97 | 0   | 4   |
| – political efficacy index            | 383   | 0.10 | 0.93 | -3  | 1   |
| <i>Social Efficacy:</i>               |       |      |      |     |     |
| – fair society achievable             | 383   | 4.23 | 0.84 | 1   | 5   |
| – community stands up f. fair society | 383   | 0.65 | 0.48 | 0   | 1   |
| – inequality inevitable               | 368   | 0.39 | 0.49 | 0   | 1   |
| – social efficacy index               | 368   | 0.08 | 1.01 | -3  | 2   |
| <i>Other Efficacy Variables:</i>      |       |      |      |     |     |
| – protest type effective.             | 379   | 0.57 | 0.50 | 0   | 1   |
| – combined efficacy index             | 383   | 0.19 | 0.97 | -4  | 2   |
| <i>Personal Power:</i>                |       |      |      |     |     |
| – people listen to me                 | 383   | 3.25 | 0.77 | 0   | 4   |
| – my opinions are ignored             | 383   | 1.42 | 1.11 | 0   | 4   |
| – my wishes not valued                | 383   | 1.47 | 1.08 | 0   | 4   |
| – power index                         | 383   | 0.12 | 0.96 | -2  | 2   |
| <i>Crime Blame:</i>                   |       |      |      |     |     |

---

|                                    |     |       |       |    |    |
|------------------------------------|-----|-------|-------|----|----|
| – blame people                     | 377 | 0.11  | 0.32  | 0  | 1  |
| – blame police                     | 377 | 0.11  | 0.31  | 0  | 1  |
| – blame government                 | 377 | 0.38  | 0.49  | 0  | 1  |
| – blame poverty/inequ              | 377 | 0.40  | 0.49  | 0  | 1  |
| <i>Service Blame:</i>              |     |       |       |    |    |
| – blame people                     | 383 | 0.17  | 0.38  | 0  | 1  |
| – blame agency                     | 383 | 0.10  | 0.30  | 0  | 1  |
| – blame government                 | 383 | 0.35  | 0.48  | 0  | 1  |
| – blame poverty/inequ              | 383 | 0.38  | 0.49  | 0  | 1  |
| – broad blame attrib.              | 377 | 6.02  | 1.54  | 2  | 8  |
| <i>Protest Scope:</i>              |     |       |       |    |    |
| – choice docs & nurses march       | 382 | 0.41  | 0.49  | 0  | 1  |
| – choice corruption march          | 382 | 0.28  | 0.45  | 0  | 1  |
| – choice redistribution march      | 382 | 0.31  | 0.46  | 0  | 1  |
| – net support redistribution march | 383 | -0.35 | 1.13  | -3 | 3  |
| – net support corruption march     | 383 | -0.33 | 0.96  | -3 | 2  |
| <i>Petition:</i>                   |     |       |       |    |    |
| – petition personnell              | 348 | 0.40  | 0.49  | 0  | 1  |
| – petition corruption              | 348 | 0.30  | 0.46  | 0  | 1  |
| – petition redistribution          | 348 | 0.30  | 0.46  | 0  | 1  |
| <i>Demographics:</i>               |     |       |       |    |    |
| – female                           | 383 | 0.60  | 0.49  | 0  | 1  |
| – age                              | 383 | 44.64 | 16.48 | 18 | 87 |
| – secondary school degree          | 383 | 0.34  | 0.48  | 0  | 1  |

---

Table A.6: Randomization

|               | (1)<br>sex        | (2)<br>secondary<br>education | (3)<br>age        | (4)<br>grievance<br>level | (5)<br>identity<br>scope |
|---------------|-------------------|-------------------------------|-------------------|---------------------------|--------------------------|
| High Efficacy | -0.014<br>(0.031) | 0.003<br>(0.030)              | 2.589*<br>(1.018) | 0.039<br>(0.031)          | 0.029<br>(0.051)         |
| Low Efficacy  | -0.024<br>(0.031) | 0.023<br>(0.030)              | 1.920<br>(1.011)  | 0.011<br>(0.031)          | -0.073<br>(0.051)        |
| Observations  | 1482              | 1482                          | 1478              | 1482                      | 1418                     |

Standard errors in parentheses

Controls: fieldworker, area

\*  $p < 0.05$ , \*\*  $p < 0.01$ , \*\*\*  $p < 0.001$

Figure A.1: Treatment Effect on March Choice: Marginal Effects

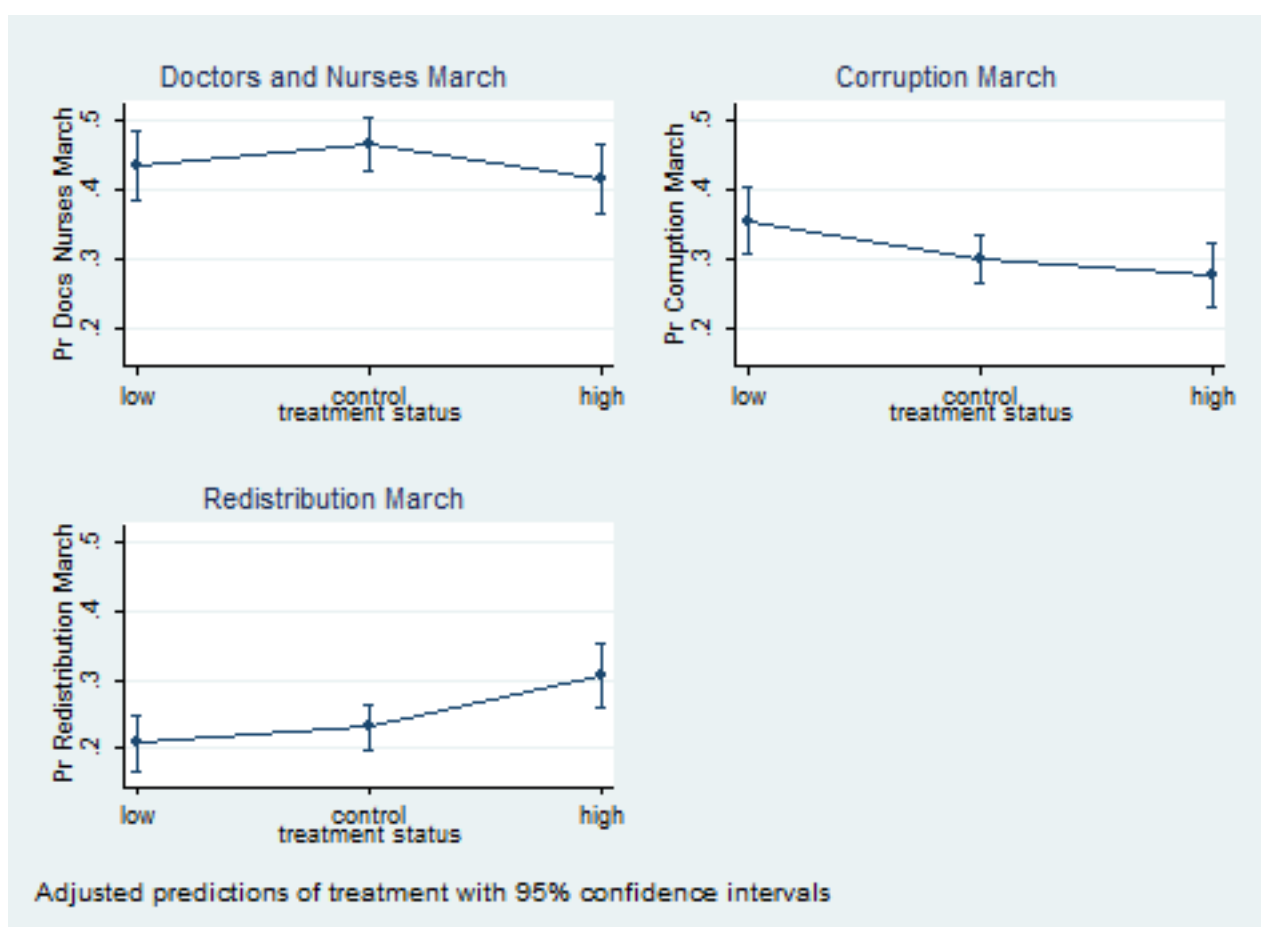

Table A.7: Petition and System Justification Outcomes

|               | (1)<br>Petition<br>Corruption | (2)<br>Petition<br>Redistribution | (3)<br>System<br>Justification |
|---------------|-------------------------------|-----------------------------------|--------------------------------|
| High Efficacy | -0.021<br>(0.031)             | 0.061*<br>(0.028)                 | -0.026<br>(0.060)              |
| Low Efficacy  | 0.056<br>(0.030)              | -0.023<br>(0.028)                 | 0.091<br>(0.060)               |
| Observations  | 1358                          | 1358                              | 1478                           |

Note: Results from OLS regressions of the outcome variables in the column on treatment condition. Standard errors in parentheses. \*  $p < 0.05$ , \*\*  $p < 0.01$ , \*\*\*  $p < 0.001$

Table A.8: Alternative Specification of Blame Attribution Variables

|               | (1)<br>Blame<br>People | (2)<br>Blame<br>Agencies | (3)<br>Blame<br>Government | (4)<br>Blame<br>Inequality |
|---------------|------------------------|--------------------------|----------------------------|----------------------------|
| High Efficacy | -0.163***<br>(0.030)   | -0.046<br>(0.026)        | 0.053<br>(0.031)           | 0.077*<br>(0.031)          |
| Low Efficacy  | -0.071*<br>(0.030)     | 0.034<br>(0.026)         | -0.010<br>(0.031)          | 0.021<br>(0.031)           |
| Observations  | 1459                   | 1459                     | 1459                       | 1459                       |

Note: Results from OLS regressions of the outcome variables in the column on treatment condition. Controls: fieldworker, area, female, age, completed secondary schooling. Standard errors in parentheses.

\*  $p < 0.05$ , \*\*  $p < 0.01$ , \*\*\*  $p < 0.001$

Figure A.2: Treatment Effect on Efficacy Scope: Marginal Effects

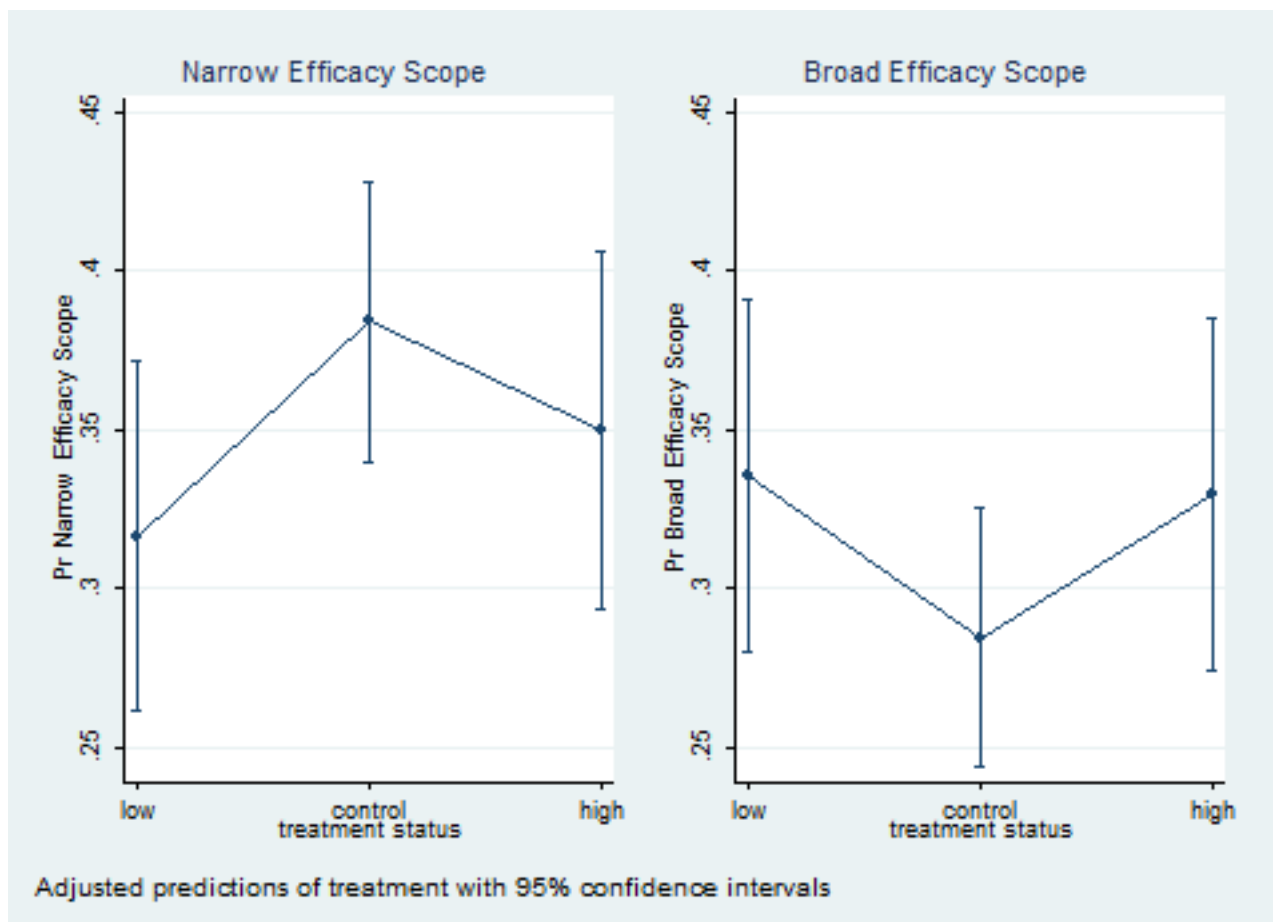

## B Internal Validity

The experimental approach allows us to establish the causal effect of our treatments. However, our theoretical framework concerns the causal effect of efficacy perceptions. Attributing the causal effect to efficacy requires the assumption that the treatment has not brought about other changes in the individual relevant to our results besides affecting their efficacy perceptions.

Although we designed the two treatment conditions with this concern in mind by changing only one word between these conditions, asking individuals to recall successful/ unsuccessful protest may induce different memories that may lead to different perceptions or thoughts. While we cannot exhaustively partial out all these, we can verify two important issues. First, we examine if respondents in the high versus low condition had different recall rates, which would induce potentially problematic sample selection. Second, we examine if the characteristics of the protests recalled by respondents in the high versus low condition differ in systematic ways. We base test assessment on the questions we asked respondents directly after they remembered a successful/ unsuccessful protest. These questions asked about the time period, the protest motive, and the protest size of the remembered protest, among others.

Table B.1 shows the results. Reassuringly, recall rates between the two conditions are identical. Furthermore, some characteristics of the recalled protest are similar, such as whether the individual was present or knew someone in the protest in question. However, other characteristics differ substantially. Respondents asked to recall a successful protest are more likely to recall a larger one, one having occurred during Apartheid, and with a topic other than services.

These differences could potentially have important implications for the validity of the results. In particular, protests during Apartheid were more likely to be of broad scope, i.e. about changing the political regime. Accordingly, it is plausible that respondents asked to recall a successful protest subsequently report broader attribution and protest scope, not because of efficacy perceptions, but because of respondents' memories of Apartheid-era protests.



Table B.1: Treatment effect on characteristics of remembered protest

|                          | (1)               | (2)                           | (3)               | (4)                    | (5)                 | (6)                 | (7)                  | (8)               | (9)               |
|--------------------------|-------------------|-------------------------------|-------------------|------------------------|---------------------|---------------------|----------------------|-------------------|-------------------|
|                          | Remem.<br>Protest | Particip./<br>Knew<br>someone | When<br>Recent    | When<br>last<br>10 yrs | When<br>Aparth.     | > 1000<br>People    | Topic<br>Services    | Topic<br>Crime    | Topic<br>Work     |
| High Efficacy<br>vs. low | -0.013<br>(0.024) | 0.021<br>(0.036)              | -0.056<br>(0.037) | -0.092*<br>(0.037)     | 0.148***<br>(0.027) | 0.121***<br>(0.036) | -0.116***<br>(0.034) | -0.009<br>(0.030) | -0.012<br>(0.028) |
| <i>N</i>                 | 776               | 663                           | 663               | 662                    | 662                 | 663                 | 659                  | 659               | 659               |

Note: Results from OLS regressions of the outcome variables in the column on treatment condition. Controls: fieldworker, area, female, age, completed secondary schooling. Standard errors in parentheses. \*  $p < 0.05$ , \*\*  $p < 0.01$ , \*\*\*  $p < 0.001$

To address this issue, we investigate if the results hold when we control for the characteristics of the protests recalled, in particular for the time period, the size, and the topic of the recalled protest. Strictly speaking, these variables are endogenous, and this makes coefficients of this regression hard to interpret. Nevertheless, we believe that the exercise is useful because if results remain similar to the benchmark specification, it suggests that our results are *not* driven by Apartheid or large protests.

Table B.2 shows the results, focusing on the key outcome variables. The table shows comparisons between the high efficacy and the low efficacy condition only, because there is no information on types of protest for the control group. Our main results clearly hold even when controlling for protest characteristics. The top panel (benchmark model) reproduces the results from before and the second panel "with protest characteristics controls" shows the results from the same analysis with dummy variables for key protest characteristics, namely time period, topic, and size of the remembered protests. The coefficients shown in the first and second panel are very similar, suggesting that the Apartheid protest memories of the high efficiency condition are not driving our results.

We perform a further test to check that our results reflect the treatment working as intended. Because they are thought experiments ("please remember..."), the treatments in this experiment require a degree of effort and engagement from respondents to serve their purpose. If results are driven by the intended treatment effect, they should be stronger for people who have engaged more intensively with the treatments. We built three items into the survey that measure respondent engagement as reported by the enumerators. At the end of the survey, the enumerators rated engagement with the treatment, and overall boredom, and distraction of the respondents during the survey on a scale from one to five.

The third panel of table B.2 reproduces the analysis in panel 2 but restricting the sample to respondents scoring maximum levels of engagement and minimum levels of boredom and distraction. Comparing the coefficients to the benchmark model, we observe that we have larger and significant coefficients across the board for efficacy, choosing and the redistribution march, and systemic blame attribution. In contrast, the coefficient for

believing that broad protest are effective remains small and insignificant.

Table B.2: Robustness Checks

|                                                                            | (2)                  | (3)                     | (4)                                | (5)                       |                                |
|----------------------------------------------------------------------------|----------------------|-------------------------|------------------------------------|---------------------------|--------------------------------|
|                                                                            | Combined<br>Efficacy | March<br>Redistribution | Support<br>March<br>Redistribution | Broad<br>Blame<br>Attrib. | Broad<br>Protests<br>Effective |
| <i>Benchmark model</i>                                                     |                      |                         |                                    |                           |                                |
| High Efficacy<br>vs. low                                                   | 0.289***<br>(0.068)  | 0.096**<br>(0.031)      | 0.101<br>(0.077)                   | 0.515***<br>(0.117)       | 0.022<br>(0.034)               |
| Observations                                                               | 751                  | 772                     | 776                                | 768                       | 765                            |
| <i>With Protest Characteristics Controls</i>                               |                      |                         |                                    |                           |                                |
| High Efficacy<br>vs. low                                                   | 0.362***<br>(0.076)  | 0.090*<br>(0.037)       | 0.156<br>(0.091)                   | 0.561***<br>(0.135)       | 0.048<br>(0.039)               |
| Observations                                                               | 625                  | 644                     | 646                                | 638                       | 639                            |
| <i>With Protest Characteristics Controls &amp; restricted to motivated</i> |                      |                         |                                    |                           |                                |
| High Efficacy<br>vs. low                                                   | 0.441***<br>(0.104)  | 0.134**<br>(0.048)      | 0.292*<br>(0.118)                  | 0.562**<br>(0.173)        | 0.028<br>(0.050)               |
| Observations                                                               | 399                  | 410                     | 410                                | 405                       | 405                            |

Standard errors in parentheses; \*  $p < 0.05$ , \*\*  $p < 0.01$ , \*\*\*  $p < .001$ . All models control for fieldworker, female, age, secondary schooling.

*Protest Characteristics* are dummy variables for the time period, topic, and size of the remembered protest. *Motivated Respondents*: Fieldworkers subjectively rated how engaged respondents were with the treatment and how bored or distracted they were during the survey (possibly by the presence of other people or chores, etc.) (all on scales from 1 to 5). “Motivated” captures respondents that were most engaged and least bored and distracted. It takes value 1 if respondents had the highest value in engagement, and lowest in boredom and distraction.

## C Results power treatment

The *power treatment* seeks to induce a sense of power / powerlessness in respondents to study whether personal power is related to protest scope. We attempt to operationalize the approach in ? in our setting. In their study, students are asked to write an essay about a situation where they had power over someone/ where someone else had power over them. In our setting - face to face interviews - respondents are asked to *think* about such situations but without telling the interviewer any details about the experience. A series of follow-up questions is asked to make respondents dwell on the situation (setting of the experience, age, sex, race of other person involved, how happy/unhappy powerful/powerless they felt).

Table C.1 shows that respondents asked to remember situations where they had power over someone report similar power perceptions (as well as efficacy ones) as those asked to remember a situation where someone had power over them. Both high and low power conditions induce individuals to report being more powerful (and perceive higher political efficacy) than the control. It is not clear why this is the case. It may be that respondents asked to recall a situation where someone had power over them reacted by reasserting their dignity. Irrespective of the reason, the implication is that the power treatment is not able to yield insights on the role of power/ efficacy for protest scope.

Table C.1: Manipulation Check Power Treatment

|              | (1)               | (2)                 | (3)                   | (4)                |
|--------------|-------------------|---------------------|-----------------------|--------------------|
|              | Personal<br>power | Protest<br>efficacy | Political<br>efficacy | Social<br>efficacy |
| power_high   | 0.099<br>(0.055)  | 0.031<br>(0.062)    | 0.111<br>(0.059)      | -0.027<br>(0.061)  |
| power_low    | 0.113*<br>(0.057) | 0.036<br>(0.064)    | 0.081<br>(0.062)      | -0.056<br>(0.064)  |
| Observations | 1422              | 1422                | 1422                  | 1388               |

Note: Results from OLS regressions of the outcome variables in the column on treatment condition. Controls: fieldworker, area, female, age, completed secondary schooling. Standard errors in parentheses. \*  $p < 0.05$ , \*\*  $p < 0.01$ , \*\*\*  $p < 0.001$
